# Supplementary material for: Human red blood cell behaviour in hydroxyethyl starch: probed by single cell spectroscopy
Source: Royal Society of Chemistry journal article supplement (doi:10.1039/d0ra05842d), 2020-01-01
Supplement: d0ra05842d1.pdf [file d0ra05842d1.pdf]

**Supplementary Table S1**

| Sl. No | Raman bands | P value   |            |            |             |
|--------|-------------|-----------|------------|------------|-------------|
|        |             | 3 mw      | 5 mw       | 7 mw       | 11 mw       |
| 1      | 1222/1209   | 0.00104   | 9.17852E-4 | 7.7116E-13 | 1.94877E-12 |
| 2      | 1565/1544   | 0.28384   | 0.39587    | 1.73329E-5 | 3.9975E-10  |
| 3      | 1636        | 0.00993   | 0.00106    | 1.28367E-5 | 5.18177E-8  |
| 4      | 999         | 2.1339E-6 | 0.00301    | 6.02779E-6 | 6.74324E-5  |
| 5      | 752         | 0.00337   | 0.00872    | 0.00138    | 0.00366     |
| 6      | 565         | 0.04852   | 0.73327    | 0.00186    | 6.04367E-5  |
| 7      | 674         | 0.02315   | 0.02157    | 3.54166E-4 | 1.57916E-4  |
